# An immunogenic NSCLC microenvironment is associated with favorable survival in lung adenocarcinoma

Kevin B. Givechian<sup>1</sup>, Chad Garner<sup>2</sup>, Steve Benz<sup>1</sup>, Bing Song<sup>1</sup>, Shahrooz Rabizadeh<sup>1,2</sup> and Patrick Soon-Shiong<sup>1,2,3</sup>

<sup>1</sup>NantOmics LLC, Culver City, CA 90232, USA

<sup>2</sup>NantHealth, Inc. NantWorks, Culver City, CA 90232, USA

<sup>3</sup>NantBioscience, Inc. NantWorks, Culver City, CA 90232, USA

**Correspondence to:** Kevin B. Givechian, *email:* Kevin.Givechian@nantomics.com

**Keywords:** NSCLC; lung adenocarcinoma; lung squamous cell carcinoma; tumor immunology; tumor microenvironment

**Abbreviations:** NSCLC: non-small cell lung cancer; LUAD: lung adenocarcinoma; LUSC: lung squamous cell carcinoma; OS: overall survival; TME: tumor microenvironment

**Received:** January 25, 2019

**Accepted:** February 15, 2019

**Published:** March 05, 2019

**Copyright:** Givechian et al. This is an open-access article distributed under the terms of the Creative Commons Attribution License 3.0 (CC BY 3.0), which permits unrestricted use, distribution, and reproduction in any medium, provided the original author and source are credited.

## ABSTRACT

The tumor microenvironment consists of an intricately organized system through which immune cells and cancer cells may communicate to regulate anti-tumor immunogenicity. To this end, non-small cell lung cancer (NSCLC) has been shown to activate a variety of immunological mechanisms, thereby broadening our understanding of lung cancer immunobiology. However, while recent work has highlighted the importance of NSCLC immunology and prognosis, studies have not yet examined the tumor microenvironment (TME) globally in regards to the survival outcomes between two major NSCLC subtypes: lung adenocarcinoma (LUAD) and lung squamous cell carcinoma (LUSC). In the present study, we identify an immunogenic tumor microenvironment state in NSCLC that is enriched for the lung adenocarcinoma subtype. By utilizing TME cell enrichment scores and RNA-seq expression data, we show that the inflamed TME is associated with favorable patient survival in lung adenocarcinoma, but this does not hold true for lung squamous cell carcinoma. Moreover, differentially regulated pathways between immune-inflamed and immune-excluded tumors within LUAD and LUSC were not subtype specific. Instead, immune-inflamed LUSC samples possessed elevated immune checkpoint marker expression when compared to those of the LUAD samples, thereby offering a putative explanation for our prognostic observations. These results shed light on the immunological prognostic effects within lung cancer and may encourage further TME exploration between these two subtypes as the landscape of NSCLC therapy progresses.

## INTRODUCTION

Lung cancer is the leading cause of cancer-related deaths [1], although non-small cell lung cancer (NSCLC) immunotherapy has fortunately emerged as a relatively promising area of research. In particular, immune checkpoint blockade has found a efficacious niche within NSCLC [2]. However, much work remains to elucidate lung tumor immunobiology and how alternative tumor microenvironments (TME) can affect patient survival across different NSCLC subtypes.

The TME has surfaced as a fascinating area of study across various tumor types [3]. In fact, broad categorizations have been proposed to stratify variable levels of immunogenicity. Immune-inflamed TMEs ('hot' tumors) express high levels of cytotoxic lymphocytes and immune activation markers (e.g., CD8, PRF1) [3–5]. Tumors with this TME subtype are often associated with a favorable prognosis [6]. Conversely, patients with immune-excluded TMEs ('cold' tumors) exhibit the opposite trend in survival [3, 6–8]. More specifically, interesting spatial organizations, such as compartmentalized or mixed TMEs,

and their unique associations with survival have also been shown [9]. Together, recent work has encouraged further prognostic analysis of the TME to better understand the immune, stromal, and cancer signals that are integral to the clinical aftermath of this highly complex environment.

In NSCLC, several studies have advanced our understanding of TME [10–12]. However, despite being the two major subtypes, analysis of the TME within and between LUAD and LUSC remain scarce. Accordingly, the differential survival associations of immunogenicity within LUAD and LUSC have not yet been explored despite observations of differential immune activity between these subtypes [13–15]. In the present study, we sought to determine whether an immune-inflamed TME would be enriched for a certain NSCLC subtype and whether this would be reflected in patient overall survival. We find that immune-inflamed LUADs are associated with improved overall survival compared to their immune-excluded LUAD counterparts. However, this is not observed to be true for immune-inflamed LUSCs. Accordingly, we find that this profile of immune-inflamed profile of LUSC displays elevated immune checkpoint expression compared to immune-inflamed LUADs, thereby offering a putative explanation for our prognostic observations.

## RESULTS

### Identification of an immunogenic tumor microenvironment enriched for lung adenocarcinoma

The overview of the study design is shown in Figure 1. In order to determine whether an immunogenic

TME was enriched for LUAD vs LUSC tumor samples, unsupervised clusters were produced using immune and stromal cell type enrichment scores [16]. One cluster (cluster2) was significantly enriched for LUAD tumor samples ( $P < 0.0001$ ,  $\chi^2 = 113.9$ ; Figure 2A). In order to determine whether the clusters produced were indeed indicative of immunogenic TMEs, we examined gene expression levels of several immunogenic activation markers between cluster1 and cluster2, namely CD8A, PRF1, HLA-A, and GZMA, which are shown to be favorably expressed in immunogenic tumors [4, 5, 17–21]. Expressions of these 4 genes were significantly elevated in cluster2 ( $P = 4.15e-7$ ,  $P = 2.0e-6$ ,  $3.93e-12$ ,  $4.90e-5$ ; Figure 2B–2E), which was enriched for LUAD. Neoantigen count was also compared between cluster1 and cluster2 since it is a molecular feature that is often associated with favorable immune phenotype [5, 22]. However, neither cluster was differentially associated with neoantigen count ( $P > 0.05$ ; Figure 2F).

We next sought to explore whether there was a difference in survival between the two clusters produced. To do this, we first conducted overall survival (OS) analysis across LUAD and LUSC, to show that in the TCGA data used, neither lung cancer subtype was differentially associated with OS ( $P = 0.440$ , HR = 1.26 [0.84–1.52], Supplementary Figure 1A), thereby excluding subtype as a confounding variable. Overall survival between the two clusters did not differ, although the survival difference appeared to be trending towards significance ( $P = 0.082$ , HR = 0.76 [0.55–1.04]; Figure 2G). Considering that the immunogenic TME observed was enriched for LUAD samples, and that previous work has shown subtype dependent differences in LUAD and LUSC [13–15, 23, 24], we next sought to explore each subtype individually.

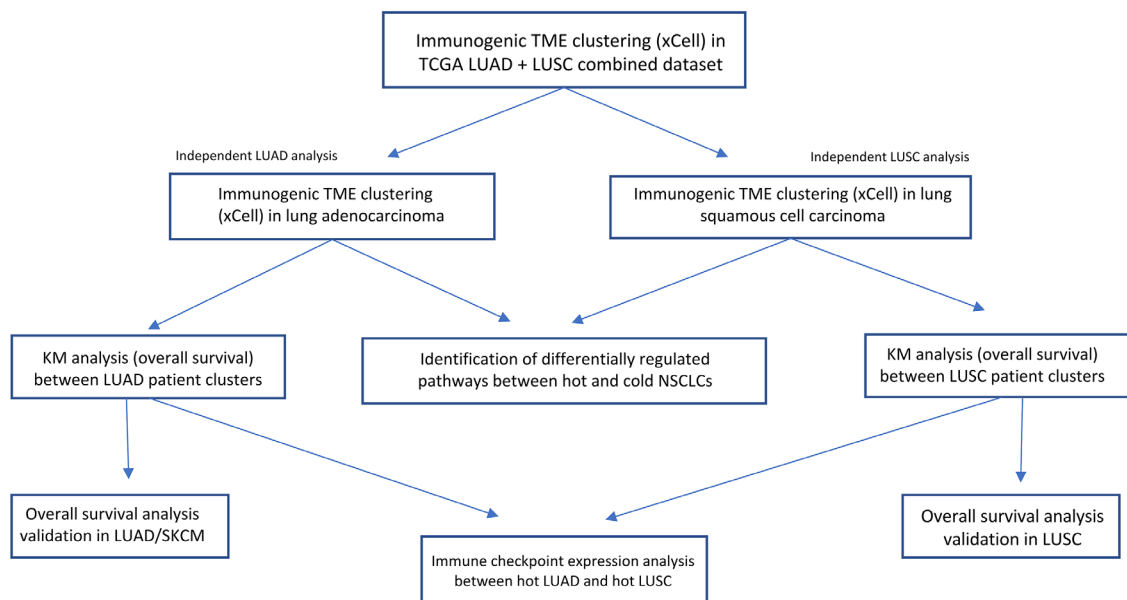

Figure 1: Experimental workflow of TME analysis in LUAD and LUSC patient tumor samples.



upregulated in hot versus cold tumors. As expected, these genes were enriched for immune-related pathways such as cytokine-cytokine receptor interaction and chemokine signaling (Figure 4C; Supplementary Table 2).

When these methods were applied to cold versus hot LUSC tumor samples, 102 genes were differentially upregulated in cold tumors (Figure 4D). These genes were also enriched for RNA transport, ribosomal, metabolic, and nucleotide metabolism pathways (Figure 4E; Supplementary Table 3). Furthermore, the 1705 upregulated genes in the hot LUSC tumors were enriched for similar pathways as observed in LUAD (Figure 4F; Supplementary Table 4). This suggested that the differential prognostic association observed was not due to upregulated pathways unique to LUAD or LUSC.

### Immunosuppressive checkpoint biomarker expression is elevated in hot LUSC tumors

In light of the pathway analysis results, we reasoned that perhaps the overall survival differences observed

could be explained by differences in immunosuppression, so we examined expression differences of several well-characterized immune checkpoint genes [33–39]. To explore this in an unsupervised manner, we first combined hot LUSC with hot LUAD samples and produced k-means clusters using nine immune checkpoint gene expressions: PD1, PDL1, CTLA4, PDL2, LAG3, IDO1, TIGIT, TIM3, FOXP3. This yielded two distinct clusters, one of which (cluster1) was enriched for LUSC samples ( $P = 0.0019$ ,  $\chi^2 = 9.69$ ; Figure 5A). Moreover, a direct comparison of these genes between hot LUSC and hot LUAD tumors revealed that 7 of 9 of these immune checkpoint genes (LAG3, PDL2, PD1, PDL1, TIGIT, CTLA4, FOXP3) were significantly elevated in LUSC tumor samples ( $P = 3.30e-5$ ,  $P = 9.87e-4$ ,  $P = 4.08e-3$ ,  $P = 7.22e-3$ ,  $P = 8.20e-3$ ,  $P = 0.038$ ,  $P = 2.57e-3$ ; Figure 5B–5H, respectively).

### DISCUSSION

In the current study, we explored the prognostic associations of an immune-inflamed TME state across

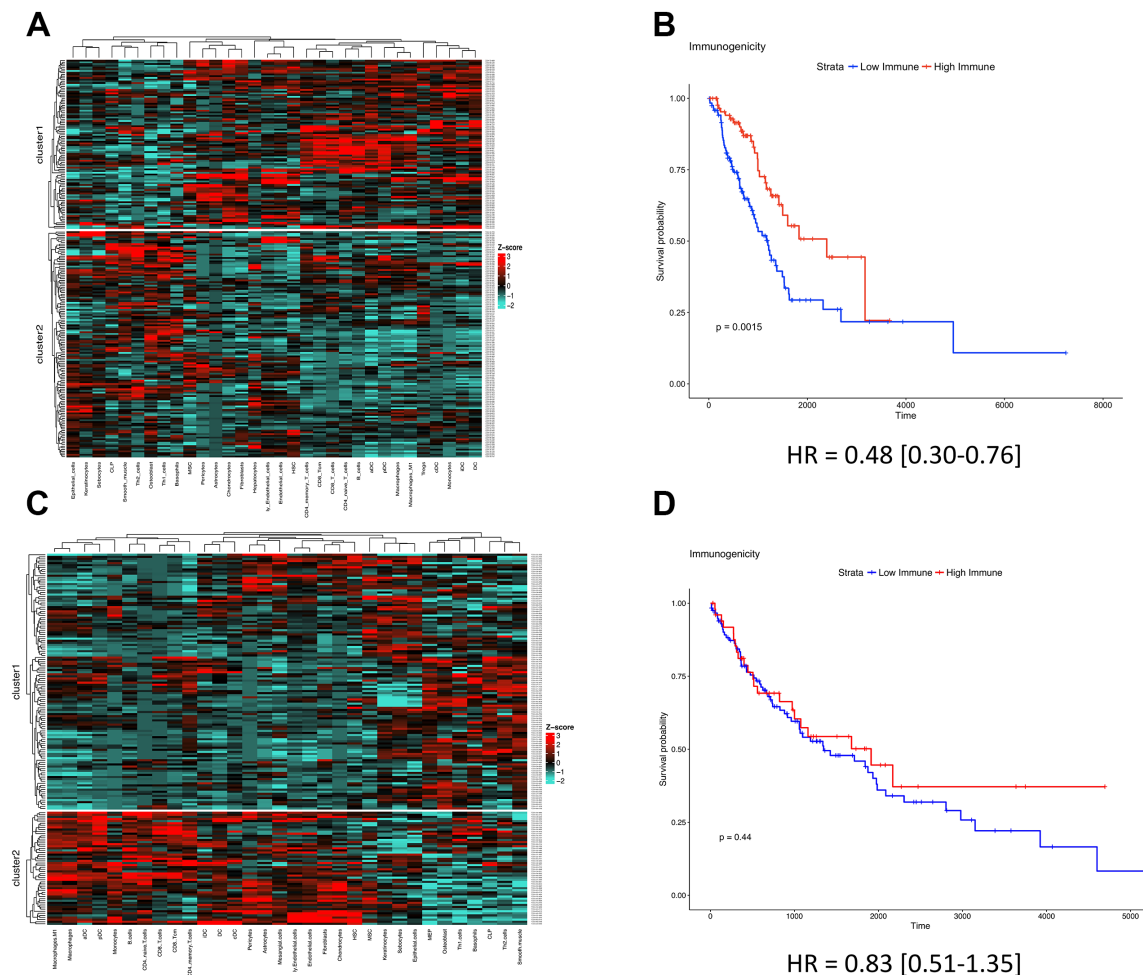

**Figure 3: An immune-inflamed TME is associated with survival in LUAD but not in LUSC.** (A) LUAD clusters derived from cell type enrichment scores. (B) KM survival plot of LUAD cluster1 (red) vs LUAD cluster2 (blue) ( $P = 0.0018$ ). (C) LUSC clusters derived from cell type enrichment scores. (D) KM survival plot of LUSC cluster1 (blue) vs LUSC cluster2 (red) ( $P = 0.44$ ).

two main subtypes of NSCLC. As a result, we found that an immunogenic TME is uniquely associated with patient overall survival in LUAD as opposed to LUSC. An important aspect of our study is that we considered the holistic state of the TME rather than any one cell type and its prognostic association alone. This unsupervised approach used was able to cluster patients with high co-enrichment scores of the following cell types that have also been individually reported in association with favorable survival, such as M1 macrophages, activated dendritic cells, B cells, CD4+ T-cells, and CD8+ T-cells [12, 40–42]. This co-enrichment methodology also showed that markers of immune activation were consistently associated

with the immune-inflamed cluster regardless of k-means features used or the subtype examined. Moreover, these methods may encourage further efforts to capture the TME state in regards to its overall co-enrichment landscape with immune and stromal cells as opposed to individual immune cells, which may be differentially associated with prognosis in alternative contexts [21, 43].

In regards to the differential pathway analysis, it is interesting to note the consistent association between the immune-excluded tumors, purine/pyrimidine metabolism, and metabolic activity. This is in line with recent work that highlights intratumoral metabolic crosstalk and how this communication

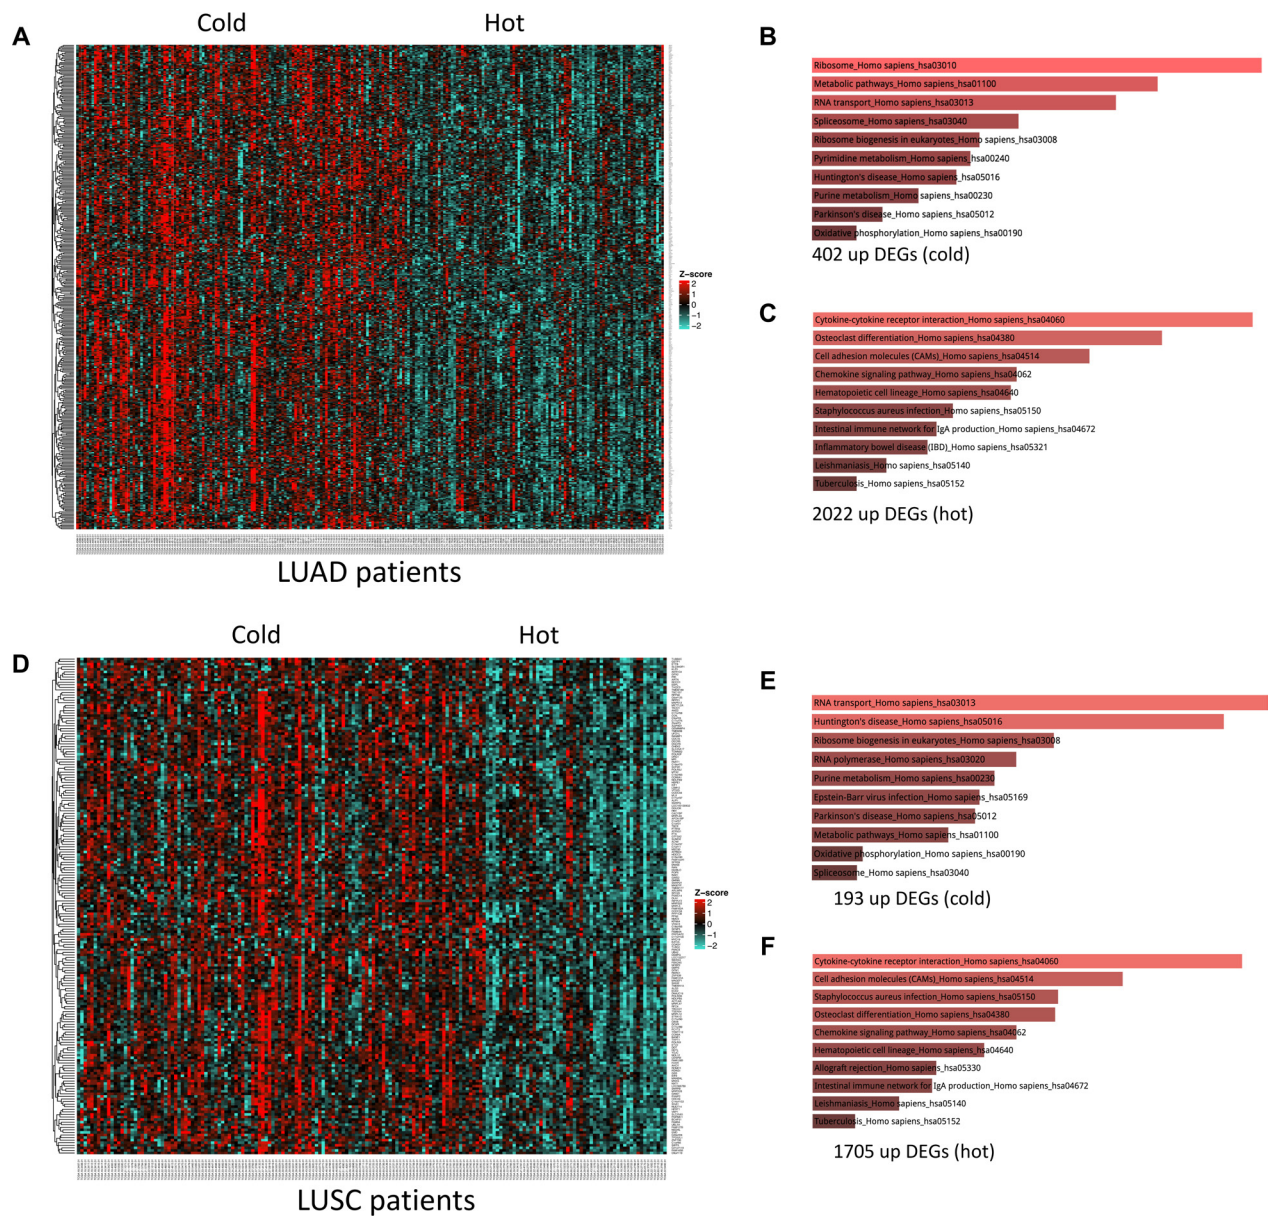

**Figure 4: Differentially expressed genes (DEGs) and enriched pathways in hot vs cold tumor samples. (A)** heatmap of upregulated genes in cold vs hot LUADs. **(B)** enriched pathways of the 402 upregulated genes in cold vs hot LUADs. **(C)** enriched pathways of the 2022 upregulated genes in hot vs cold LUADs. **(D)** heatmap of upregulated genes in cold vs hot LUSCs. **(E)** enriched pathways of the 193 upregulated genes in cold vs hot LUSCs. **(F)** enriched pathways of the 1705 upregulated genes in hot vs cold LUSCs.

may impair antitumor immunity [29, 44, 45]. Furthermore, we previously reported an association between less immunogenic tumors and nucleotide metabolism across five different tumor types [21], which is also consistent with our pathway analysis findings in the present study. Future work may include whether there exist targetable metabolic vulnerabilities that may result in enhanced immune infiltration into otherwise immune-excluded NSCLCs.

While examining the possible pro- or anti-tumor roles of each TME cell type is beyond the scope of our holistic TME study, we found it interesting that the 32-cell feature sets consistently included both Th1 and Th2 cells. These two helper T cell subtypes were co-enriched in the same patient clusters, despite being thought to be associated with different processes; that is, Th1 cells induce IFNG

expression and anti-tumor effects while Th2 release IL-4 and IL-10, which help allow for tumor-escape [46, 47]. Whilst the less immunogenic and less favorably surviving LUAD patients showed elevated enrichment of both Th1 and Th2 cells, this result is in line with a previous study using different methods (e.g., flow cytometry) to show that high levels of Th1 in the TME is associated with worse prognosis in NSCLC [47]. Lastly, considering the relative scarcity of studies investigating the clinical differences between Th1 and Th2 cells in different TME contexts [48, 49], it is possible that this Th1-Th2 balance could mark an avenue worthy of further prognostic investigation, either alone or while considering potential tumor promoting metabolic pathways previously mentioned.

When examining immune checkpoint marker expression, the immune-inflamed LUSC tumors expressed

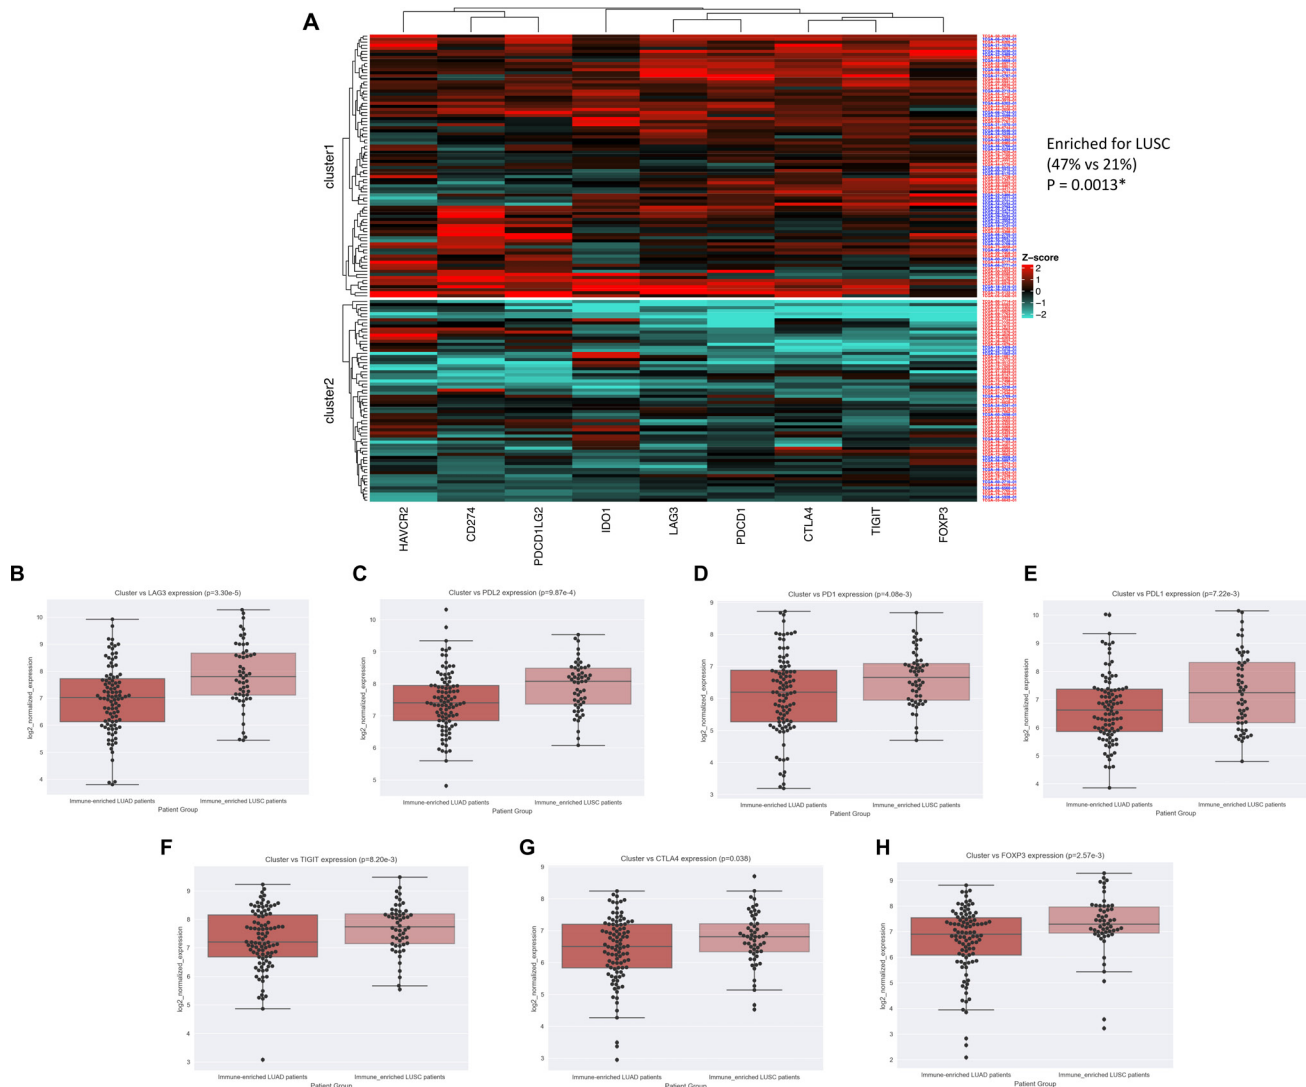

**Figure 5: LUSC is enriched for immune checkpoint expression.** (A) Heatmap visualization of k-means clusters ( $P = 0.0013$ ) (LUAD = red patient ID labels, LUSC= blue patient ID labels). NSCLC subtype vs immune-checkpoint marker expression for (B) LAG3 ( $P = 3.30e-5$ ), (C) PDL2 ( $P = 9.87e-4$ ), (D) PD1 ( $P = 4.08e-3$ ), (E) PDL1 ( $P = 7.22e-3$ ), (F) TIGIT ( $P = 8.20e-3$ ), (G) CTLA4 ( $P = 0.038$ ), and (H) FOXP3 ( $P = 2.57e-3$ ).

significantly higher levels of seven genes known to inhibit the anti-tumor immune response. Of these seven, LAG3 was most significant, in line with previous work showing its increased expression in non-adenocarcinomas of NSCLC [50]. Moreover, LAG3 is known to be expressed on the surface of CD4+ and CD8+ cells, implicating the possibility that the tumor-infiltrating lymphocytes (TILs) within immune-inflamed LUSCs of our study were in a more exhausted state than immune-inflamed LUADs [38, 51]. This may thereby offer an explanation as to why immune-inflamed LUSCs were not associated with favorable prognosis. Furthermore, considering the growing body of evidence that patients with pre-existing immunity respond better to immunotherapy [52], our findings may encourage prospective validation in which LUSC patients with pre-existing immune-inflammation are selected for treatment with immunotherapy given their higher expression of ICB target genes.

There are several limitations to our study. First, the TME states used to cluster patient tumor samples were largely dependent on xCell output accuracy. While this tool has been shown to outperform other immune cell scoring methods, it is unable to infer the spatial TME architecture of a sample, which may differ between LUAD and LUSC. Second, our immune checkpoint marker analysis was limited to several genes that are currently well-characterized in regards to immunosuppression. However, this list of candidate genes may evolve as our understanding of cancer immunology progresses. Third, the data analyzed does not have matched treatment labels recorded for each patient. While data analyzed was pre-treatment transcriptomic/genomic data, it is possible that differential treatment-related effects on the TME, combined with treatment use for LUAD vs LUSC, could possibly influence our results. However, an important feature of our study to note is that our prognostic results are not confounded by immunotherapy use—the data analyzed was generated prior to the invention and standard clinical use of checkpoint inhibitor drugs, making ICB drug use an unlikely confounding factor. To this end, based on previous work [52], we speculate that OS significance levels would become more dramatic for LUAD patients if they with treated immune checkpoint inhibitor drugs since immune-inflamed tumors are suggested to present better candidates for immunotherapy.

In conclusion, our study highlights the prognostic impact of an immune-inflamed TME within LUAD as opposed to LUSC. We show that despite similar pathway expression, immune checkpoint marker expression seems to distinguish a LUSC subtype devoid of prognostic benefit in the context of immune-inflammation. This may encourage further exploration of potential treatable differences that may benefit one NSCLC subtype over the other. Furthermore, our unsupervised analysis of the TME in relation to survival may inspire functional validation of the pertinent immune cells that could be driving the prognostic trends observed.

## MATERIALS AND METHODS

### TME clustering

The cell-type deconvolution tool xCell has become an increasingly popular tool to infer cell-type enrichment scores from RNA expression data. In short, xCell is a computational tool that outputs enrichment scores for 64 immune and stromal cell types. It is a gene signature-based method that takes RNA-seq data as input and employs a curve fitting approach to linearly compare 64 immune and stromal cell types within a tumor sample. xCell introduces a novel spillover compensation method for separating these cell types and outperforms other methods in part by integrating the advantages of gene set enrichment and deconvolution approaches [16]. We chose to include both immune and stromal cells in the analysis as both types have been shown to influence the context of the tumor microenvironment [53]. However, as opposed to using all 64 cell types as input features, we only used the highly variable 32 cell types as our feature cell set (median standard deviation cutoff for the 64 immune enrichment scores within the dataset for the clusters produced). We only used the 32 highly variable cells because we hypothesized that the clinical variability (e.g., overall survival) would be strongly reflected by the enrichment variability of the TME cells themselves; we believed the cells with higher variability could better capture alternatively immunogenic tumor microenvironments.

K-means is a popular vector quantization method within the domain of machine learning that we used to produce unsupervised clusters ( $k = 2$ ) using xCell enrichment scores as input features [16]. This was executed via the ComplexHeatmap package in R [54]. When LUAD and LUSC were combined, the highly variable cell types across the entire dataset (LUAD and LUSC combined) were used as input features to produce clusters. Proportional LUAD/LUSC enrichment significance was determined using the “N-1” Chi-squared test ( $P < 0.05$  was considered significant,  $DF = 1$ ) [55, 56]. When each subtype was explored independently, the input features (highly variable cells) were obtained from within their respective subtype. However, to ensure that the results were not subtype-feature dependent, LUSC input features were validated in LUAD (Supplementary Figure 4A, 4B), and LUAD features were validated in LUSC (Supplementary Figure 4C–4D), showing that the observed prognostic results were independent of potential tissue-specific input features.

### Survival analysis

Data used for overall survival analysis (OS) was downloaded from OncoLnc (oncolnc.org) [57]. This data was parsed in Python and Kaplan-Meier plots were then produced in R. The coxph survival function in R (survival/survminer package in R) was used for significance

analysis, hazard ratios, and 95% confidence intervals ( $P < 0.05$  was considered significant).

### NSCLC genomic data (discovery and validation)

The RNA-seq data used to analyze gene expression differences between k-means clusters produced was  $\log_2(x+1)$  transformed RSEM normalized count data downloaded from xenabrowser (<https://xenabrowser.net/datapages/>, datasets: TCGA.LUAD.sampleMap/HiSeqV2 and TCGA.LUSC.sampleMap/HiSeqV2). For LUAD, there were 517 tumor samples with available RNA-seq data, and for LUSC, there were 501 tumor samples with available RNA-seq data (clinical data available at <http://www.cbioportal.org/datasets>). However, in the discovery datasets, only samples that also had available mutation data (and thus inferred neoantigen counts [58]) were included. This provided 230 LUAD samples and 176 LUSC samples with matched RNA-seq and neoantigen data (1 outlier LUSC sample was removed for visualization; results were not affected). Patient neoantigen data was downloaded from TCIA (neoantigen methods previously described [58]).

The held out LUAD and LUSC data sets consisted of patient tumor samples that did not have available mutation/neoantigen data which used earlier on. This left 287 LUAD samples and 324 LUSC samples that had available RNA-seq (and thus xCell scores) as validation sets. We performed this validation to show that the results we observed were not specific to the initial datasets examined and increase our overall sample size. Furthermore, to help ensure robustness of the clustering method we used, we applied these methods to the TCGA SKCM dataset as a positive control. We used SKCM because it is shown to also harbor prognostic associations between immunogenicity and patient survival [27, 28].

### Gene expression and pathway analysis

Patient RNA-seq expression values were accessed using the fbget API (<https://confluence.broadinstitute.org/display/GDAC/fbget>) and parsed using custom Python scripts. Two-tailed t-tested were used to assess differentially expressed genes between tumor samples of the different clusters ( $P < 0.05$  was considered significant). The Seaborn and Matplotlib libraries were used to produce and visualize expression swarm-boxplots.

To identify upregulated genes in immune-inflamed and immune-excluded tumors, whole transcriptomic analysis was performed to surface the differentially expressed genes (acceptable  $P < 2.4e-6$ ). These genes were then used as inputs in the Enrichr pathway analysis tool to identify enriched Kegg pathways in a given cluster (adjusted  $P < 0.05$  was considered significant). Heatmaps were produced using the ComplexHeatmap package in R, and pathway bar plots were obtained using the Enrichr tool [59].

### Author contributions

KBG was responsible for hypothesis generation, bioinformatics and prognostic analyses, research design, data interpretation, and manuscript drafting/editing. CG and SB were responsible for advising the methodology/workflow, and final manuscript editing. BS, SR, and PSS were responsible for final manuscript editing/advising.

### ACKNOWLEDGMENTS

Not applicable.

### CONFLICTS OF INTEREST

All authors of the study are currently employees of NantOmics and/or NantBioscience.

### FUNDING

This work was funded by NantOmics LLC, Culver City, CA 90232, USA.

### REFERENCES

1. Jemal A, Bray F, Center MM, Ferlay J, Ward E, Forman D. Global cancer statistics. *CA Cancer J Clin*. 2011; 61:69–90.
2. Aldarouish M, Wang C. Trends and advances in tumor immunology and lung cancer immunotherapy. *J Exp Clin Cancer Res*. 2016; 35:157.
3. Binnewies M, Roberts EW, Kersten K, Chan V, Fearon DF, Merad M, Coussens LM, Gaborilovich DI, Ostrand-Rosenberg S, Hedrick CC. Understanding the tumor immune microenvironment (TIME) for effective therapy. *Nat Med*. 2018; 24:541–550.
4. Patel SJ, Sanjana NE, Kishton RJ, Eidizadeh A, Vodnala SK, Cam M, Gartner JJ, Jia L, Steinberg SM, Yamamoto TN, Merchant AS, Mehta GU, Chichura A, et al. Identification of essential genes for cancer immunotherapy. *Nature*. 2017; 548:537–542.
5. Brown SD, Warren RL, Gibb EA, Martin SD, Spinelli JJ, Nelson BH, Holt RA. Neo-antigens predicted by tumor genome meta-analysis correlate with increased patient survival. *Genome Res*. 2014; 24:743–750.
6. Pages F, Galon J, Dieu-Nosjean M, Tartour E, Sautes-Fridman C, Fridman W. Immune infiltration in human tumors: a prognostic factor that should not be ignored. *Oncogene*. 2010; 29:1093–102.
7. Geng Y, Shao Y, He W, Hu W, Xu Y, Chen J, Wu C, Jiang J. Prognostic role of tumor-infiltrating lymphocytes in lung cancer: a meta-analysis. *Cell Physiol Biochem*. 2015; 37:1560–1571.
8. Fridman WH, Galon J, Dieu-Nosjean MC, Cremer I, Fisson S, Damotte D, Pages F, Tartour E, Sautes-Fridman C.

- Immune infiltration in human cancer: prognostic significance and disease control. *Curr Top Microbiol Immunol*. 2011; 344:1–24.
9. Keren L, Bosse M, Marquez D, Angoshtari R, Jain S, Varma S, Yang SR, Kurian A, Van Valen D, West R. A structured tumor-immune microenvironment in triple negative breast cancer revealed by multiplexed ion beam imaging. *Cell*. 2018; 174:1373–1387.e1319.
  10. Ito M, Ishii G, Nagai K, Maeda R, Nakano Y, Ochiai A. Prognostic impact of cancer-associated stromal cells in patients with stage I lung adenocarcinoma. *Chest*. 2012; 142:151–158.
  11. Navab R, Strumpf D, Bandarchi B, Zhu CQ, Pintilie M, Ramnarine VR, Ibrahimov E, Radulovich N, Leung L, Barczyk M. Prognostic gene-expression signature of carcinoma-associated fibroblasts in non-small cell lung cancer. *Proc Natl Acad Sci U S A*. 2011; 108:7160–5.
  12. Al-Shibli KI, Donnem T, Al-Saad S, Persson M, Bremnes RM, Busund LT. Prognostic effect of epithelial and stromal lymphocyte infiltration in non-small cell lung cancer. *Clin Cancer Res*. 2008; 14:5220–5227.
  13. Chen M, Liu X, Du J, Wang XJ, Xia L. Differentiated regulation of immune-response related genes between LUAD and LUSC subtypes of lung cancers. *Oncotarget*. 2017; 8:133–144. <https://doi.org/10.18632/oncotarget.13346>.
  14. Sun F, Yang X, Jin Y, Chen L, Wang L, Shi M, Zhan C, Shi Y, Wang Q. Bioinformatics analyses of the differences between lung adenocarcinoma and squamous cell carcinoma using The Cancer Genome Atlas expression data. *Mol Med Rep*. 2017; 16:609–616.
  15. Seo JS, Kim A, Shin JY, Kim YT. Comprehensive analysis of the tumor immune micro-environment in non-small cell lung cancer for efficacy of checkpoint inhibitor. *Sci Rep*. 2018; 8:14576.
  16. Aran D, Hu Z, Butte AJ. xCell: digitally portraying the tissue cellular heterogeneity landscape. *Genome Biol*. 2017; 18:220.
  17. Adams S, Gray RJ, Demaria S, Goldstein L, Perez EA, Shulman LN, Martino S, Wang M, Jones VE, Saphner TJ, Wolff AC, Wood WC, Davidson NE, et al. Prognostic Value of Tumor-Infiltrating Lymphocytes in Triple-Negative Breast Cancers From Two Phase III Randomized Adjuvant Breast Cancer Trials: ECOG 2197 and ECOG 1199. *J Clin Oncol*. 2014; 32:2959–2966.
  18. Rooney MS, Shukla SA, Wu CJ, Getz G, Hacohen N. Molecular and genetic properties of tumors associated with local immune cytolytic activity. *Cell*. 2015; 160:48–61.
  19. Perea F, Sánchez-Palencia A, Gómez-Morales M, Bernal M, Concha Á, García MM, González-Ramírez AR, Kerick M, Martin J, Garrido F, Ruiz-Cabello F, Aptsiauri N. HLA class I loss and PD-L1 expression in lung cancer: impact on T-cell infiltration and immune escape. *Oncotarget*. 2017; 9:4120–4133. <https://doi.org/10.18632/oncotarget.23469>.
  20. Kawai O, Ishii G, Kubota K, Murata Y, Naito Y, Mizuno T, Aokage K, Saijo N, Nishiwaki Y, Gemma A. Predominant infiltration of macrophages and CD8+ T cells in cancer nests is a significant predictor of survival in stage IV nonsmall cell lung cancer. *Cancer*. 2008; 113:1387–1395.
  21. Givuchian KB, Wnuk K, Garner C, Benz S, Garban H, Rabizadeh S, Niazi K, Soon-Shiong P. Identification of an immune gene expression signature associated with favorable clinical features in Treg-enriched patient tumor samples. *NPJ Genom Med*. 2018; 3:14.
  22. Efremova M, Finotello F, Rieder D, Trajanoski Z. Neoantigens generated by individual mutations and their role in cancer immunity and immunotherapy. *Front Immunol*. 2017; 8:1679.
  23. Zhou S, Wang P, Su X, Chen J, Chen H, Yang H, Fang A, Xie L, Yao Y, Yang J. High ECT2 expression is an independent prognostic factor for poor overall survival and recurrence-free survival in non-small cell lung adenocarcinoma. *PLoS One*. 2017; 12:e0187356.
  24. Liu L, Ruiz J, O'Neill SS, Grant SC, Petty WJ, Yang M, Chen K, Topaloglu U, Pasche B, Zhang W. Favorable outcome of patients with lung adenocarcinoma harboring POLE mutations and expressing high PD-L1. *Mol Cancer*. 2018; 17:81.
  25. Zeng DQ, Yu YF, Ou QY, Li XY, Zhong RZ, Xie CM, Hu QG. Prognostic and predictive value of tumor-infiltrating lymphocytes for clinical therapeutic research in patients with non-small cell lung cancer. *Oncotarget*. 2016; 7:13765–81. <https://doi.org/10.18632/oncotarget.7282>.
  26. Jackute J, Zemaitis M, Pranys D, Sitkauskienė B, Miliauskas S, Vaitkienė S, Sakalauskas R. Distribution of M1 and M2 macrophages in tumor islets and stroma in relation to prognosis of non-small cell lung cancer. *BMC Immunol*. 2018; 19:3.
  27. Ladányi A. Prognostic and predictive significance of immune cells infiltrating cutaneous melanoma. *Pigment Cell Melanoma Res*. 2015; 28:490–500.
  28. Thorsson V, Gibbs DL, Brown SD, Wolf D, Bortone DS, Ou Yang TH, Porta-Pardo E, Gao GF, Plaisier CL, Eddy JA. The immune landscape of cancer. *Immunity*. 2018; 48:812–830.e814.
  29. Lyssiotis CA, Kimmelman AC. Metabolic interactions in the tumor microenvironment. *Trends Cell Biol*. 2017; 27:863–875.
  30. Siddiqui N, Borden KL. mRNA export and cancer. *Wiley Interdiscip Rev RNA*. 2012; 3:13–25.
  31. Zhou X, Liao WJ, Liao JM, Liao P, Lu H. Ribosomal proteins: functions beyond the ribosome. *J Mol Cell Biol*. 2015; 7:92–104.
  32. Silvera D, Formenti SC, Schneider RJ. Translational control in cancer. *Nat Rev Cancer*. 2010; 10:254–66.
  33. Yu H, Boyle TA, Zhou C, Rimm DL, Hirsch FR. PD-L1 expression in lung cancer. *J Thorac Oncol*. 2016; 11:964–975.

34. Paulsen EE, Kilvaer TK, Rakaee M, Richardsen E, Hald SM, Andersen S, Busund LT, Bremnes RM, Donnem T. CTLA-4 expression in the non-small cell lung cancer patient tumor microenvironment: diverging prognostic impact in primary tumors and lymph node metastases. *Cancer Immunol Immunother.* 2017; 66:1449–1461.
35. Arrieta O, Montes-Servín E, Hernandez-Martinez JM, Cardona AF, Casas-Ruiz E, Crispín JC, Motola D, Flores-Estrada D, Barrera L. Expression of PD-1/PD-L1 and PD-L2 in peripheral T-cells from non-small cell lung cancer patients. *Oncotarget.* 2017; 8:101994–102005. <https://doi.org/10.18632/oncotarget.22025>.
36. Andrews LP, Marciscano AE, Drake CG, Vignali DA. LAG 3 (CD 223) as a cancer immunotherapy target. *Immunol Rev.* 2017; 276:80–96.
37. Karanikas V, Zamanakou M, Kerenidi T, Dahabreh J, Hevas A, Nakou M, Gourgoulianis KI, Germenis AE. Indoleamine 2, 3-dioxygenase (IDO) expression in lung cancer. *Cancer Biol Ther.* 2007; 6:1269–1268.
38. Anderson AC, Joller N, Kuchroo VK. Lag-3, Tim-3, and TIGIT: co-inhibitory receptors with specialized functions in immune regulation. *Immunity.* 2016; 44:989–1004.
39. Facciabene A, Motz GT, Coukos G. T-regulatory cells: key players in tumor immune escape and angiogenesis. *Cancer Res.* 2012; 72:2162–2171.
40. Mei J, Xiao Z, Guo C, Pu Q, Ma L, Liu C, Lin F, Liao H, You Z, Liu L. Prognostic impact of tumor-associated macrophage infiltration in non-small cell lung cancer: a systemic review and meta-analysis. *Oncotarget.* 2016; 7:34217–28. <https://doi.org/10.18632/oncotarget.9079>.
41. Yang P, Ma J, Yang X, Li W. Peripheral CD4+ naive/memory ratio is an independent predictor of survival in non-small cell lung cancer. *Oncotarget.* 2017; 8:83650–83659. <https://doi.org/10.18632/oncotarget.19330>.
42. Germain C, Gnjjatic S, Tamzalit F, Knockaert S, Remark R, Goc J, Lepelley A, Becht E, Katsahian S, Bizouard G. Presence of B cells in tertiary lymphoid structures is associated with a protective immunity in patients with lung cancer. *Am J Respir Crit Care Med.* 2014; 189:832–844.
43. Barnes TA, Amir E. HYPE or HOPE: the prognostic value of infiltrating immune cells in cancer. *Br J Cancer.* 2017; 117:451–460.
44. Anastasiou D. Tumour microenvironment factors shaping the cancer metabolism landscape. *Br J Cancer.* 2017; 116:277–286.
45. Murray PJ. Amino acid auxotrophy as a system of immunological control nodes. *Nat Immunol.* 2016; 17:132–9.
46. Li J, Wang Z, Mao K, Guo X. Clinical significance of serum T helper 1/T helper 2 cytokine shift in patients with non-small cell lung cancer. *Oncol Lett.* 2014; 8:1682–1686.
47. Jian H, Fangrong S, Haitao H, Chunhua L, Guangbo Z. Th1high in tumor microenvironment is an indicator of poor prognosis for patients with NSCLC. *Oncotarget.* 2017; 8:13116–13125. <https://doi.org/10.18632/oncotarget.14471>.
48. Shang B, Liu Y, Jiang SJ, Liu Y. Prognostic value of tumor-infiltrating FoxP3+ regulatory T cells in cancers: a systematic review and meta-analysis. *Sci Rep.* 2015; 5:15179.
49. Ito N, Suzuki Y, Taniguchy Y, Ishigurok K, Nakamura H, Ohgi S. Prognostic significance of T helper 1 and 2 and T cytotoxic 1 and 2 cells in patients with non-small cell lung cancer. *Anticancer Res.* 2005; 25:2027–2031.
50. He Y, Yu H, Rozeboom L, Rivard C, Ellison K, Dziadziszko R, Suda K, Ren S, Wu C, Hou L. LAG-3 Protein Expression in Non-Small Cell Lung Cancer and Its Relationship with PD-1/PD-L1 and Tumor-Infiltrating Lymphocytes. *J Thorac Oncol.* 2017; 12:814–823.
51. Yang Z, Kim H, Villasboas JC, Price-Troska T, Jalali S, Novak A, Ansell S. Expression of LAG-3 defines exhaustion of intratumoral PD-1+ T cells and correlates with poor outcome in follicular lymphoma. *Hematol Oncol.* 2017; 35:260–261.
52. Gnjjatic S, Bronte V, Brunet LR, Butler MO, Disis ML, Galon J, Hakansson LG, Hanks BA, Karanikas V, Khleif SN. Identifying baseline immune-related biomarkers to predict clinical outcome of immunotherapy. *J Immunother Cancer.* 2017; 5:44.
53. Lambrechts D, Wauters E, Boeckx B, Aibar S, Nittner D, Burton O, Bassez A, Decaluwé H, Pircher A, Van den Eynde K. Phenotype molding of stromal cells in the lung tumor microenvironment. *Nat Med.* 2018; 24:1277–1289.
54. Gu Z, Eils R, Schlesner M. Complex heatmaps reveal patterns and correlations in multidimensional genomic data. *Bioinformatics.* 2016; 32:2847–2849.
55. Campbell I. Chi-squared and Fisher–Irwin tests of two-by-two tables with small sample recommendations. *Stat Med.* 2007; 26:3661–3675.
56. Richardson JT. The analysis of 2 × 2 contingency tables–Yet again. *Stat Med.* 2011; 30:890.
57. Anaya J. OncoLnc: linking TCGA survival data to mRNAs, miRNAs, and lncRNAs. *PeerJ Comput Sci.* 2016; 2:e67.
58. Charoentong P, Finotello F, Angelova M, Mayer C, Efremova M, Rieder D, Hackl H, Trajanoski Z. Pan-cancer Immunogenomic Analyses Reveal Genotype-Immunophenotype Relationships and Predictors of Response to Checkpoint Blockade. *Cell Rep.* 2017; 18:248–262.
59. Chen EY, Tan CM, Kou Y, Duan Q, Wang Z, Meirelles GV, Clark NR, Ma’ayan A. Enrichr: interactive and collaborative HTML5 gene list enrichment analysis tool. *BMC Bioinformatics.* 2013; 14:128.
