# Supplementary material for: An immunogenic NSCLC microenvironment is associated with favorable survival in lung adenocarcinoma
Source: PubMed Central journal article supplement (PMC6442995; doi:10.18632/oncotarget.26748), 2019-03-05
Supplement: oncotarget-10-1840-s001.pdf [file oncotarget-10-1840-s001.pdf]

## An immunogenic NSCLC microenvironment is associated with favorable survival in lung adenocarcinoma

### SUPPLEMENTARY MATERIALS

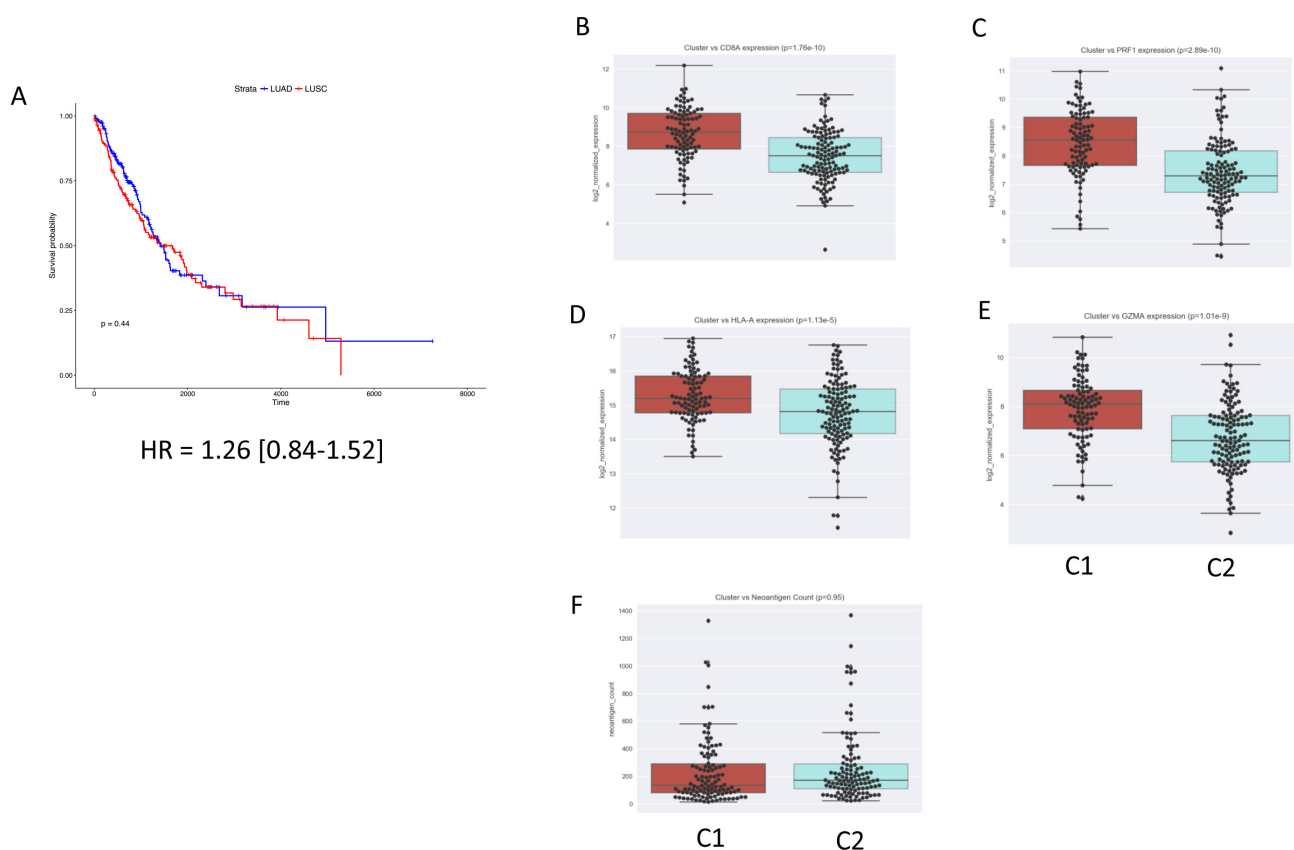

**Supplementary Figure 1: Immune gene expression and neoantigen count analysis between unsupervised clusters produced from LUAD samples.** Immune marker analysis between clusters produced within LUAD. First, we show that (A) neither lung cancer subtype was differentially associated with OS ( $P = 0.440$ , HR = 1.26 [0.84–1.52]). Gene expression levels of several immunogenic activation markers between cluster1 and cluster2: (B) CD8A, (C) PRF1, (D) HLA-A, and (E) GZMA were elevated in cluster1 LUAD tumors samples ( $P = 1.76e-10$ ,  $P = 2.89e-10$ ,  $P = 1.13e-5$ , and  $P = 1.01e-9$ , respectively). (F) Neither cluster is associated with neoantigen count ( $P > 0.05$ ).

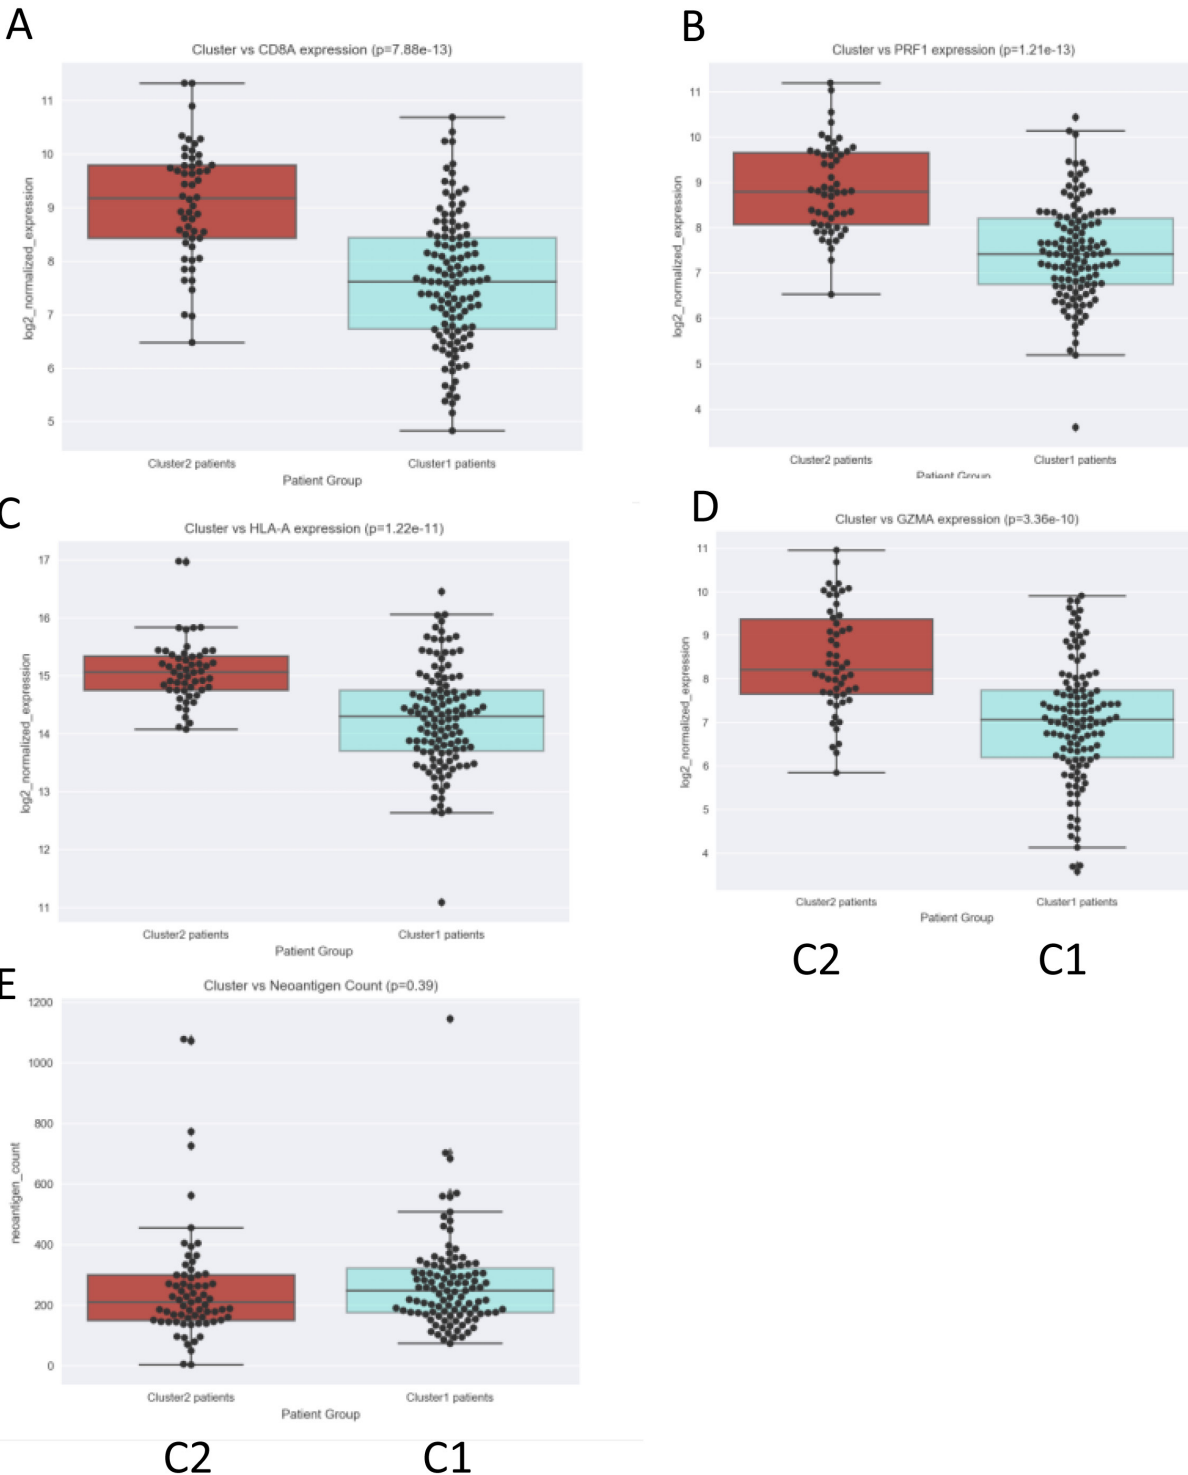

**Supplementary Figure 2: Immune gene expression and neoantigen count analysis between unsupervised clusters produced from LUSC samples.** Immune marker analysis between clusters produced within LUSC. Gene expression levels of several immunogenic activation markers between cluster1 and cluster2: (A) CD8A, (B) PRF1, (C) HLA-A, and (D) GZMA were elevated in cluster2 LUSC tumors samples ( $P = 7.88e-13$ ,  $P = 1.21e-13$ ,  $P = 1.22e-11$ , and  $P = 3.36e-10$ , respectively). (E) Neither cluster is associated with neoantigen count ( $P > 0.05$ ).

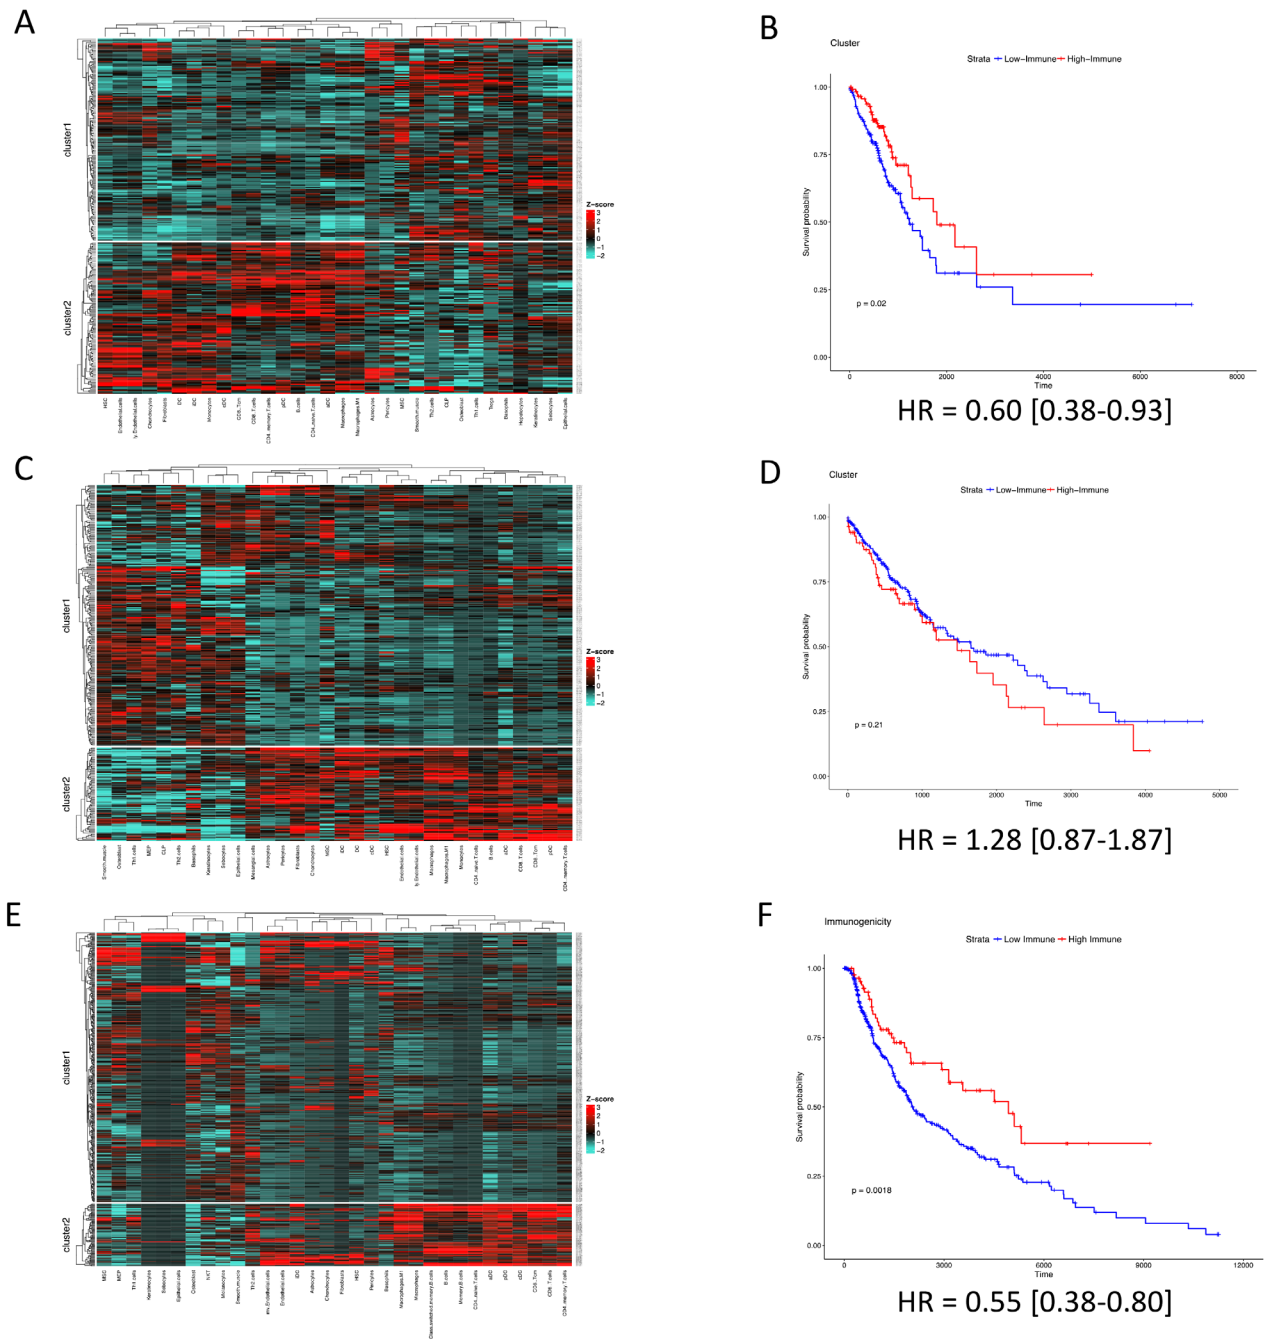

**Supplementary Figure 3: Validation analysis using additional LUAD, LUSC, and melanoma samples.** Overall survival validation analysis. Results from the study were again observed in (A, B) a held-out LUAD validation data set ( $P = 0.02$ , HR = 0.60 [0.38–0.93]), (C, D) a held-out LUSC data set ( $P = 0.21$ , HR = 1.28 [0.87 – 1.87]), and (E, F) the TCGA melanoma data set (used as a positive control [27, 28],  $P = 0.0018$ , HR = 0.55 [0.38–0.80]).

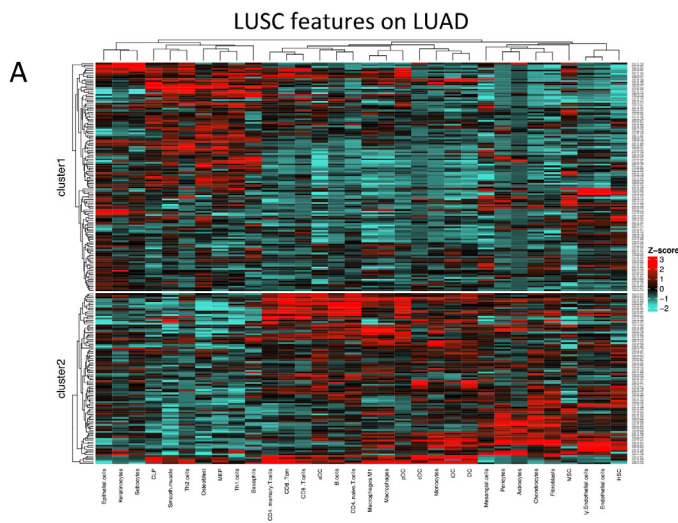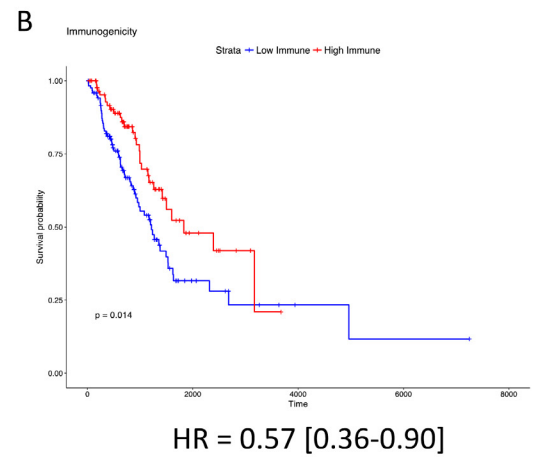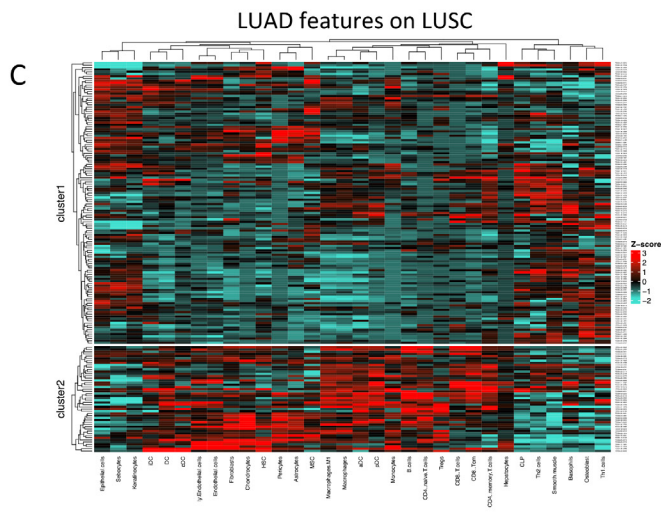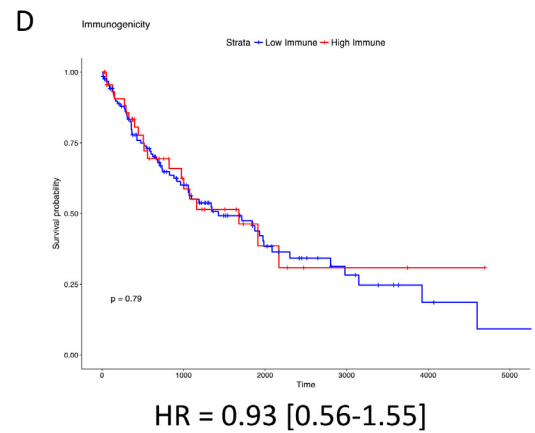

**Supplementary Figure 4: TME-prognostic associations are not dependent on subtype-specific immune and stromal cell features. Immune and stromal feature independence. (A, B) LUSC input features were validated in LUAD ( $P = 0.014$ , HR = 0.57 [0.36–0.90]), and (C, D) LUAD features were validated in LUSC ( $P > 0.05$ , HR = 0.93 [0.56–1.55]).**

**Supplementary Table 1: Kegg pathway enrichment analysis in cold LUAD samples**

| Kegg pathway                                                         | Overlap | P-value     | Adj. P-value | Z-score      | Combined score | Genes                                                                                                                                                                                                                                                                                                                                     |
|----------------------------------------------------------------------|---------|-------------|--------------|--------------|----------------|-------------------------------------------------------------------------------------------------------------------------------------------------------------------------------------------------------------------------------------------------------------------------------------------------------------------------------------------|
| Ribosome<br>Homo sapiens_<br>hsa03010                                | 15/137  | 1.13666E-07 | 1.8755E-05   | -1.746138049 | 27.92074335    | MRPS17;MRPS16;MRPS11;RPLP0;<br>MRPS18A;MRPS2;MRPL15;MRP<br>L12;MRPL24;MRPL10;MRPS5;M<br>RPL30;MRPL3;MRPL2;<br>MRPS9                                                                                                                                                                                                                       |
| Metabolic<br>pathways<br>Homo sapiens_<br>hsa01100                   | 48/1239 | 9.94831E-06 | 0.000573434  | -1.98675506  | 22.88365916    | STAT3;ACADVL;ECHS1;AHCY;A<br>CY1;SHMT2;<br>NDUFA10;ATP5G3;COX6A1;ATP<br>5G2;COX5A;PTS;<br>NT5C;ATP5B;ATIC;FLAD1;POLD<br>2;AFMID;GCNT2;<br>IDH3B;CKMT1B;CYC1;POLR2H;<br>MPST;PDHX;ALG8;MDH2;PTGE<br>S2;AKR1C3;EPT1;SORD;ALG3;T<br>ALDO1;PAICS;MCAT;PRDX6;CO<br>ASY;TRIT1;DAK;UGDH;<br>GALE;IMPDH2;HMBS;POLR1C;N<br>DUF51;UMPS;PIG;<br>ITPA |
| RNA transport<br>Homo sapiens_<br>hsa03013                           | 14/172  | 1.04261E-05 | 0.000573434  | -1.818646653 | 20.86206217    | EIF2B5;EIF2B4;POP5;EIF4A1;EIF<br>2S2;AAAS;SNUPN;FXR2;EIF3J;R<br>PP21;NUP88;GEMIN6;RAN;<br>WIBG                                                                                                                                                                                                                                            |
| Spliceosome<br>Homo sapiens_<br>hsa03040                             | 11/134  | 8.50186E-05 | 0.003507017  | -1.722670085 | 16.14596768    | PUF60;SNRPD1;PCBP1;<br>PRPF40B;SNRPE;SNRPA1;<br>SNRPC;TXNL4A;LSM4;<br>SNRPA;SNRPB                                                                                                                                                                                                                                                         |
| Ribosome<br>biogenesis in<br>eukaryotes<br>Homo sapiens_<br>hsa03008 | Aug-89  | 0.000424553 | 0.011675198  | -1.835750254 | 14.25363612    | NOP56;POP5;NOP58;<br>WDR75;<br>MPHOSPH10;IMP4;<br>RAN;GNL3                                                                                                                                                                                                                                                                                |
| Pyrimidine<br>metabolism<br>Homo sapiens_<br>hsa00240                | 9/105   | 0.000268826 | 0.008871255  | -1.680203199 | 13.81370073    | NT5C;PNPT1;TXNRD2;<br>ENTPD6;<br>POLR1C;POLD2;POLR2H;UMPS;<br>ITPA                                                                                                                                                                                                                                                                        |
| Huntington's<br>disease Homo<br>sapiens_<br>hsa05016                 | 12/193  | 0.000555192 | 0.013086658  | -1.752185995 | 13.13473205    | ATP5B;CREB3L4;NDUFA10;<br>VDAC2;NDUFS1;CYC1;ATP5G3;<br>POLR2H;COX6A1;ATP5G2;<br>COX5A;SOD1                                                                                                                                                                                                                                                |

Pathway analysis results using Kegg gene sets from upregulated genes in cold LUAD samples when compared to hot LUAD samples.

**Supplementary Table 2: Kegg pathway enrichment analysis in hot LUAD samples**

| <b>Kegg pathway</b>                                                   | <b>Overlap</b> | <b>P-value</b> | <b>Adj. P-value</b> | <b>Z-score</b> | <b>Combined score</b> |
|-----------------------------------------------------------------------|----------------|----------------|---------------------|----------------|-----------------------|
| Cytokine-cytokine receptor interaction<br>Homo sapiens_hsa04060       | 97/265         | 2.99958E-31    | 7.88891E-29         | -1.877181663   | 131.9314515           |
| Osteoclast differentiation<br>Homo sapiens_hsa04380                   | 63/132         | 2.42781E-28    | 3.19258E-26         | -1.838268548   | 116.887025            |
| Cell adhesion molecules (CAMs)<br>Homo sapiens_hsa04514               | 65/142         | 7.10402E-28    | 6.22785E-26         | -1.67764771    | 104.8726478           |
| Chemokine signaling pathway<br>Homo sapiens_hsa04062                  | 69/187         | 8.09701E-23    | 4.25903E-21         | -1.824413491   | 92.80419556           |
| Hematopoietic cell lineage<br>Homo sapiens_hsa04640                   | 47/88          | 3.37912E-24    | 2.22177E-22         | -1.699208644   | 91.83275861           |
| Staphylococcus aureus infection<br>Homo sapiens_hsa05150              | 36/56          | 1.14784E-22    | 5.03138E-21         | -1.627646943   | 82.22707419           |
| Intestinal immune network for IgA production<br>Homo sapiens_hsa04672 | 33/48          | 2.6964E-22     | 1.01307E-20         | -1.600975135   | 79.51235918           |
| Inflammatory bowel disease (IBD)<br>Homo sapiens_hsa05321             | 37/65          | 1.26484E-20    | 4.15815E-19         | -1.702813886   | 78.01741498           |
| Leishmaniasis<br>Homo sapiens_hsa05140                                | 39/73          | 2.55883E-20    | 6.72974E-19         | -1.5783542     | 71.20295119           |
| Tuberculosis<br>Homo sapiens_hsa05152                                 | 62/178         | 3.63131E-19    | 8.68212E-18         | -1.560661857   | 66.26495982           |

Pathway analysis results using Kegg gene sets from upregulated genes in hot LUAD samples when compared to cold LUAD samples.

**Supplementary Table 3: Kegg pathway enrichment analysis in cold LUSC samples**

| <b>Kegg pathway</b>                                                 | <b>Overlap</b> | <b>P-value</b> | <b>Adj. P-value</b> | <b>Z-score</b> | <b>Combined score</b> | <b>Genes</b>                                                                                                                                                    |
|---------------------------------------------------------------------|----------------|----------------|---------------------|----------------|-----------------------|-----------------------------------------------------------------------------------------------------------------------------------------------------------------|
| RNA transport<br>Homo sapiens_<br>hsa03013                          | 11/172         | 9.28028E-07    | 0.000104867         | -1.867155195   | 25.93516614           | POP5;NXT1;NCBP2;RPP40;SUMO2;<br>RPP21;NMD3;THOC3;RAE1;RAN;EIF1                                                                                                  |
| Huntington's<br>disease<br>Homo sapiens_<br>hsa05016                | 11/193         | 2.86693E-06    | 0.000161982         | -1.876166193   | 23.94413662           | COX8A;NDUFB9;NDUFB5;VDAC3;<br>POLR2F;POLR2H;COX6A1;SLC25A5;<br>POLR2I;ATP5G1;POLR2J                                                                             |
| Ribosome<br>biogenesis<br>(eukaryotes)<br>Homo sapiens_<br>hsa03008 | 6/89           | 0.000223416    | 0.006911083         | -1.930702853   | 16.23040715           | POP5;NXT1;EIF6;RPP40;NMD3;RAN                                                                                                                                   |
| RNA<br>polymerase<br>Homo sapiens_<br>hsa03020                      | 4/32           | 0.00024464     | 0.006911083         | -1.746633355   | 14.52451813           | POLR2F;POLR2H;POLR2I;POLR2J                                                                                                                                     |
| Purine<br>metabolism<br>Homo sapiens_<br>hsa00230                   | 8/176          | 0.000317897    | 0.007184474         | -1.680606227   | 13.53523765           | DGUOK;GMPS;POLR2F;HPRT1;POLR2H;<br>POLR2I;POLR2J;HDDC3                                                                                                          |
| Epstein-Barr<br>virus infection<br>Homo sapiens_<br>hsa05169        | 8/202          | 0.000790911    | 0.012767562         | -1.799836314   | 12.85501634           | PSMD14;SHFM1;POLR2F;POLR2H;POL<br>R2I;<br>POLR2J;RAN;MAPK13                                                                                                     |
| Parkinson's<br>disease<br>Homo sapiens_<br>hsa05012                 | 7/142          | 0.000464064    | 0.008739867         | -1.648540408   | 12.65335315           | COX8A;NDUFB9;NDUFB5;VDAC3;<br>COX6A1;SLC25A5;ATP5G1                                                                                                             |
| Metabolic<br>pathways<br>Homo sapiens_<br>hsa01100                  | 23/1239        | 0.001979117    | 0.027955033         | -1.837757742   | 11.44023362           | COX8A;NDUFB9;PCYT2;AHCY;NDUFB<br>5;MMAB;<br>GSS;DCXR;MPI;GMPS;AKR1C3;ALG3;<br>COX6A1;<br>ATP5G1;COASY;PTS;DGUOK;NSDHL;P<br>OLR2F;<br>HPRT1;POLR2H;POLR2I;POLR2J |

Pathway analysis results using Kegg gene sets from upregulated genes in cold LUSC samples when compared to hot LUSC samples.

**Supplementary Table 4: Kegg pathway enrichment analysis in hot LUSC samples**

| <b>Kegg pathway</b>                                                   | <b>Overlap</b> | <b><i>P</i>-value</b> | <b>Adj. <i>P</i>-value</b> | <b><i>Z</i>-score</b> | <b>Combined Score</b> |
|-----------------------------------------------------------------------|----------------|-----------------------|----------------------------|-----------------------|-----------------------|
| Cytokine-cytokine receptor interaction<br>Homo sapiens_hsa04060       | 91/265         | 1.33723E-32           | 3.59714E-30                | -1.877181663          | 137.7703492           |
| Cell adhesion molecules (CAMs)<br>Homo sapiens_hsa04514               | 63/142         | 2.82108E-30           | 3.79435E-28                | -1.701720853          | 115.785825            |
| Staphylococcus aureus infection<br>Homo sapiens_hsa05150              | 37/56          | 1.61149E-26           | 1.44497E-24                | -1.749095362          | 103.8788646           |
| Osteoclast differentiation<br>Homo sapiens_hsa04380                   | 56/132         | 7.56019E-26           | 5.08423E-24                | -1.786504382          | 103.3391241           |
| Chemokine signaling pathway<br>Homo sapiens_hsa04062                  | 65/187         | 5.82264E-24           | 2.29729E-22                | -1.798475135          | 96.21893884           |
| Hematopoietic cell lineage<br>Homo sapiens_hsa04640                   | 44/88          | 3.34955E-24           | 1.80206E-22                | -1.669973041          | 90.26741412           |
| Allograft rejection<br>Homo sapiens_hsa05330                          | 29/38          | 5.97807E-24           | 2.29729E-22                | -1.523332272          | 81.45858483           |
| Intestinal immune network for IgA production<br>Homo sapiens_hsa04672 | 32/48          | 2.69366E-23           | 9.05744E-22                | -1.552476653          | 80.67996888           |
| Leishmaniasis<br>Homo sapiens_hsa05140                                | 37/73          | 7.83495E-21           | 2.34178E-19                | -1.611535969          | 74.6071738            |
| Tuberculosis<br>Homo sapiens_hsa05152                                 | 57/178         | 3.13213E-19           | 7.65949E-18                | -1.560661857          | 66.49574843           |

Pathway analysis results using Kegg gene sets from upregulated genes in hot LUSC samples when compared to cold LUSC samples.
